# Supplementary material for: Switching from Intravenous to Subcutaneous Biological Therapy for Inflammatory Bowel Disease Patients Remains a Challenge
Source: MDPI journal article supplement (doi:10.3390/jcm13051357), 2024-02-27
Supplement: s1 [file s1]

## Supplementary S1. Questionnaire

### Demographic and disease characteristics questionnaire

1. Gender: Male / Female
2. Year of Birth: \_\_\_\_\_
3. Weight: \_\_\_\_\_ Height: \_\_\_\_\_
4. Smoking: Yes / No
5. What is your religion:
  - Jewish
  - Muslim
  - Christian
  - Other
6. The type of inflammation I have: Ulcerative Colitis / Crohn's Disease
7. At what age was Crohn's disease / ulcerative colitis diagnosed? \_\_\_\_\_
8. Mark Employment Status:
  - Full-time Employee/Volunteer
  - Part-time Employee/Volunteer
  - I am not working now.
9. Which health insurance fund do you belong to?
  - Maccabi
  - Clalit
  - Mehuchedet
  - Leumit
10. Do you come to the hospital independently? Yes / No
11. Residence - Who do you live with?
  - Alone
  - With other people (spouse/family member/caregiver
12. Is your Crohn's disease/ulcerative colitis currently active? Yes / No
13. Are you currently being treated with steroids?
  - Yes, what time? \_\_\_\_\_
  - No
14. Have you undergone surgeries related to Crohn's/Colitis?
  - Yes. How many surgeries?
  - No
15. Do you suffer from background diseases? Yes / No  
If yes, please select one of the following diseases?
  - Diabetes
  - Hypertension
  - Liver disease
  - Kidney disease
  - Heart failure
  - Ischemic heart disease
  - Asthma/COPD/other lung disease
  - Peripheral vascular disease
  - Stroke
  - Peptic ulcer disease (stomach/duodenum
  - Cancer

- HIV/AIDS
- Limb amputation
- Rheumatologic disease

### **Treatment preferences and experience questionnaire**

1. What form is your current treatment?
  - Pills (Oral)
  - Subcutaneous injections (S.C)
  - Intravenous infusion (I.V)
  - I am not receiving treatment.
2. In what form have you been receiving treatment for your disease so far? Check all forms of treatment you have received:
  - Pills (Oral)
  - Subcutaneous injections (S.C)
  - Intravenous infusion (I.V)
3. Have you ever taken a certain medication in an irregular manner? (Delayed or not in the correct dosage)? Yes / No
4. If yes, how was the medication administered?
  - Pills (Oral)
  - Subcutaneous injections (S.C)
  - Intravenous infusion (I.V)
5. If it were possible to administer any medication in any form without a difference in the medication's cost, which form of administration would you prefer?
  - Rate the preference for treatment with pills (Oral) once a day:  
Least preferred 1 ☐ 2 ☐ 3 ☐ 4 ☐ Most preferred
  - Rate the preference for subcutaneous injections (S.C) every 2 weeks:  
Least preferred 1 ☐ 2 ☐ 3 ☐ 4 ☐ Most preferred
  - Rate the preference for subcutaneous injections (S.C) every 8 weeks:  
Least preferred 1 ☐ 2 ☐ 3 ☐ 4 ☐ Most preferred
  - Rate the preference for intravenous infusion (I.V) every 8 weeks:  
Least preferred 1 ☐ 2 ☐ 3 ☐ 4 ☐ Most preferred
6. If you are currently receiving intravenous infusion, would you be interested in receiving the same medication through subcutaneous injection? Yes / No
7. If you prefer intravenous infusion over subcutaneous injection, state the reasons for preferring infusion (Multiple answers are possible):
  - Unable to self-inject/fear of needles
  - Prefer medical staff to be present during treatment
  - Want to meet a doctor after each treatment
  - Connection with other patients, social/information exchange during infusion
  - Believe that infusion is more effective
  - Longer interval between infusions
8. Based on your experience, how much time does the entire process of receiving infusion take on average, including travel time, waiting, the infusion itself, post-infusion waiting, and travel time back home/work?

- Did not receive infusion
  - Up to 3 hours
  - Up to 4 hours
  - Up to 5 hours
  - Up to 6 hours
  - More than 6 hours
9. If you prefer subcutaneous injection over intravenous infusion, state the reasons for preferring infusion (Multiple answers are possible):
- Not preferred
  - Easier self-administration at home
  - Difficulty finding a vein for infusion
  - Difficulty getting to the hospital
  - Don't want to lose a workday
  - Time-saving
  - Want to avoid exposure to infections by not going to the hospital
  - No availability of appointments for infusion
10. To what extent does the cost of the medication influence your decision in choosing the administration form?
- Very much
  - A lot
  - To some extent
  - Little
  - Not at all
