# Supplementary material for: Switching from Intravenous to Subcutaneous Biological Therapy for Inflammatory Bowel Disease Patients Remains a Challenge
Source: MDPI journal article supplement (doi:10.3390/jcm13051357), 2024-02-27
Supplement: s1 [file s1]

**Table S2.** Cost comparison table of maintenance treatment.

| <b>Drug</b>                     | <b>Comparator</b>    | <b>Recommended dosage</b>                                  | <b>Price (\$)</b> | <b>Additional payments per treatment (\$)</b>                                                                     | <b>Annually Total Cost (\$)</b> |
|---------------------------------|----------------------|------------------------------------------------------------|-------------------|-------------------------------------------------------------------------------------------------------------------|---------------------------------|
| Vedolizumab (Entyvio)           | Vial for IV infusion | 300 mg every 8 weeks                                       | 1959              | Infusion center - 110<br>Loss of workday-162<br>Public transport/ Parking – 5.50<br>Total – 277.5 (Annually-1665) | 13,419                          |
|                                 | Pen for SC injection | 108 mg every 2 weeks                                       | 957               | None                                                                                                              | 22,968                          |
| Infliximab biosimilar (Remsima) | Vial for IV infusion | 5 mg/kg every 8 weeks –<br>On average 400 mg every 8 weeks | 1968              | Infusion center - 110<br>Loss of workday-162<br>Public transport/ Parking – 5.50<br>Total – 277.5 (Annually-1665) | 13,473                          |
|                                 | Pen for SC injection | 120 mg every 2 weeks                                       | 272               | None                                                                                                              | 6,528                           |
