# Supplementary material for: Switching from Intravenous to Subcutaneous Biological Therapy for Inflammatory Bowel Disease Patients Remains a Challenge
Source: MDPI journal article supplement (doi:10.3390/jcm13051357), 2024-02-27
Supplement: s1 [file s1]

**Table S2.** Patients' Preferences: A Comparison between IV Treatment Every 8 Weeks and SC Treatment Every Two Weeks.

| Characteristics                        | Patients prefer<br>IV every 8w<br>n=157 | Patients prefer<br>SC every 2w<br>n =187 | No particular<br>preference<br>n=110 | p-value |
|----------------------------------------|-----------------------------------------|------------------------------------------|--------------------------------------|---------|
| Age (median, (IQR))                    | 36 (26-52) <sup>a</sup>                 | 46 (31-59) <sup>b</sup>                  | 44 (33.5-59) <sup>b</sup>            | 0.001   |
| Female (n, %)                          | 83 (52.9)                               | 104 (55.6)                               | 66 (60)                              | 0.515   |
| BMI (median, (IQR))                    | 24.1 (21.3-26.8) <sup>b</sup>           | 25.1 (21.7-29.1) <sup>a</sup>            | 23.9 (21.1-26.6) <sup>b</sup>        | 0.037   |
| Independent arrival to day care (n, %) | 145 (92.4)                              | 165 (88.2)                               | 104 (94.5)                           | 0.157   |
| Dwelling with other people             | 138 (87.9)                              | 158 (84.5)                               | 101 (91.8%)                          | 0.189   |
| Infusion Process Time (Mean, (SD))     | 4.37 (1.12)                             | 4.63 (1.29)                              | 4.57 (1.29)                          | 0.278   |
| Employment status                      |                                         |                                          |                                      |         |
| Currently not employed (n, %)          | 45 (28.7)                               | 60 (32.1)                                | 33 (30.0)                            | 0.918   |
| Full-time job (n, %)                   | 88 (56.1)                               | 95 (50.8)                                | 59 (53.6)                            |         |
| Part-time job (n, %)                   | 24 (15.3)                               | 32 (17.1)                                | 18 (16.4)                            |         |
| Another systemic disease* (n, %)       | 52 (33.1)                               | 68 (36.4)                                | 45 (40.9)                            | 0.426   |
| IBD type                               |                                         |                                          |                                      |         |
| Crohn's disease (n, %)                 | 96 (61.1) <sup>a</sup>                  | 140 (74.9) <sup>b</sup>                  | 71 (64.5) <sup>ab</sup>              | 0.017   |
| Ulcerative colitis (n, %)              | 61 (38.8) <sup>a</sup>                  | 47 (25.1) <sup>b</sup>                   | 39 (35.5) <sup>ab</sup>              |         |
| Age of diagnosis (median, (IQR))       | 24 (17-34) <sup>a</sup>                 | 26 (19-41) <sup>b</sup>                  | 25 (20-40.2) <sup>b</sup>            | 0.030   |
| Active disease (n, %)                  | 69 (43.9)                               | 97 (51.9)                                | 57 (51.8)                            | 0.274   |
| Quality of Life score (median, (IQR))  | 21 (11-35.5)                            | 25 (15-35)                               | 25 (11.7-34.5)                       | 0.474   |

Abbreviations: IBD, inflammatory bowel disease; IQR, interquartile range; SD, standard deviation; w, weeks.

<sup>1</sup>Another systemic disease included: Lung, liver, kidney, ischemic heart disease, congestive heart disease, peripheral vascular disease, diabetes mellites, cerebrovascular disease, rheumatic diseases, peptic ulcer disease.

<sup>2</sup> a, b Each subscript letter denotes a subset category whose column proportions do not differ significantly from each other at the p=0.05 level.
